# Supplementary material for: Lipocalin 2 Enhances Migration and Resistance against Cisplatin in Endometrial Carcinoma Cells
Source: PLOS journal article supplement (doi:10.1371/journal.pone.0155220), 2016-05-11
Supplement: S2 (10.1371/journal.pone.0155220.s002) [file journal.pone.0155220.s002]

## S2 Fig.

a

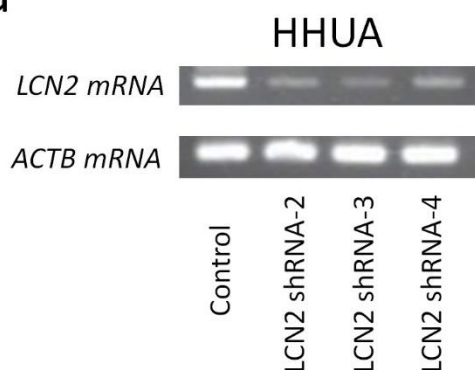

b

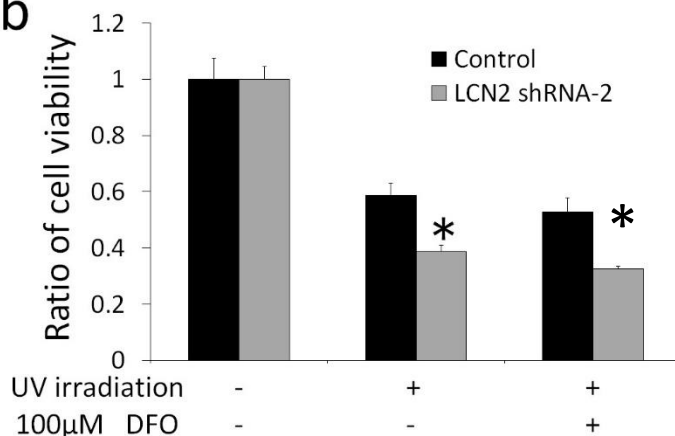

c

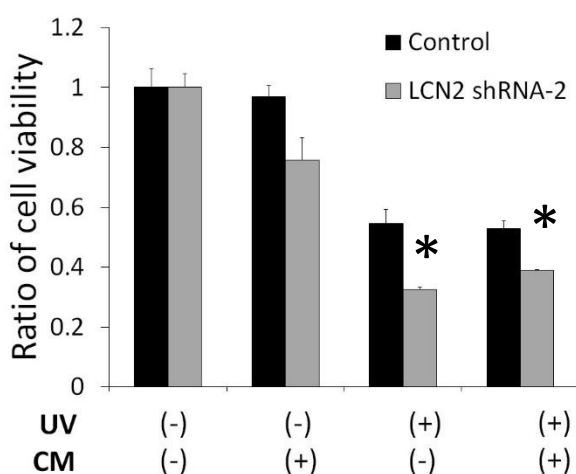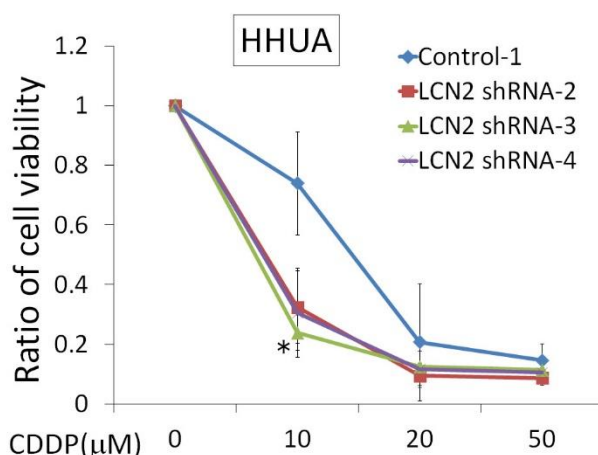

**S2 Fig. a; Expressions of LCN2 and ACTB (internal control) in HHUA Control and its LCN2-silenced clones (LCN2 shRNA-2, 3 and 4).** (Semi-quantitative RT-PCR) **b; WST-1 assay to measure survival activity 10 hours after ultraviolet (UV) irradiation with serum starvation.** Decreases in the viability of LCN2-silenced HHUA (LCN2 shRNA-2) were significantly greater than those in control HHUA (Control). The addition of deferoxamine (DFO) further reduced cell viability. \*,  $P < 0.05$ . **c; WST-1 assay after UV irradiation.** Each cell was cultured in conditioned medium (CM) collected from control HHUA (CM: +). The viability of LCN2-silenced HHUA (LCN2 shRNA-2) after UV irradiation was partially recovered by CM. \*,  $P < 0.05$  **d; WST-1 assay to measure cisplatin (CDDP) sensitivity in HHUA.** Decreases in the viability of LCN2-silenced cells (LCN2 shRNA-2, 3 and 4) were significantly greater than those of HHUA Control cells (Control). \*,  $P < 0.05$ .
